# Supplementary material
Source: MDPI journal article supplement (https://www.mdpi.com/2073-4441/12/7/1993)
Supplement: s1 [file s1]

Article

# A dual source of phosphorus to lake sediments indicated by distribution, content and speciation: Inle Lake (Southern Shan State, Myanmar)

Myat Mon Thin <sup>1</sup>, Elisa Sacchi <sup>2</sup>, Massimo Setti <sup>2</sup> and Viviana Re <sup>2,3,\*</sup>

<sup>1</sup> Department of Physics, University of Mandalay, 73 Street, P.O. Box 05032, Mandalay, Myanmar;

[demomyatmonthin.edu@gmail.com](mailto:demomyatmonthin.edu@gmail.com)

<sup>2</sup> Department of Earth and Environmental Sciences, University of Pavia, Via Ferrata 9, I-27100 Pavia, Italy;

[elisa.sacchi@unipv.it](mailto:elisa.sacchi@unipv.it) (E.S.); [massimo.setti@unipv.it](mailto:massimo.setti@unipv.it) (M.S.)

<sup>3</sup> presently at Earth Sciences Department, University of Pisa, Via Santa Maria, 53, 56126 Pisa, Italy;

[viviana.re@unipi.it](mailto:viviana.re@unipi.it)

\* Correspondence: [viviana.re@unipi.it](mailto:viviana.re@unipi.it); Tel.: +39 050 2215812

Supplementary materials

CAPTIONS

**Table S1** Water, Organic Matter, TP and relative forms extracted from grab and core sediments from Inle lake

**Table S2** Results of the Factor Analysis performed on the chemical and mineralogical data from grab and core sediments from Inle lake

**Table S3** Correlation matrix of the sediment data (water content, O.M. content, TP, P forms, Tab. 2) and the mineralogical data extracted from [Thin et al. \[632\]](#). Cc = Calcite; Qz = Quartz; M/I = Mica/Illite; Kaol = Kaolinite; Ar = Aragonite; Hem = Hematite; Dol = Dolomite. In red, correlations with  $p < 0.01$ ; in blue, correlations with  $p < 0.01$  and  $r \geq 0.8$ .

Formatted: Italian (Italy)

**Table S1** Water, Organic Matter, TP and relative forms extracted from grab and core sediments from Inle lake

| Sample type              | Name     | Water content (%) | O. M. content (%) | TP <sub>SMT</sub> (mg/kg) | IP (mg/kg) | OP (mg/kg) | Fe-P (mg/kg) | Ca-P (mg/kg) | IP/TP <sub>SMT</sub> % | OP/TP <sub>SMT</sub> % | Fe-P/TP <sub>SMT</sub> % | Ca-P/TP <sub>SMT</sub> % |
|--------------------------|----------|-------------------|-------------------|---------------------------|------------|------------|--------------|--------------|------------------------|------------------------|--------------------------|--------------------------|
| Grab sediments (0-10 cm) | SW 1     | 2                 | 8                 | 714                       | 363        | 181        | 84           | 275          | 51                     | 25                     | 12                       | 39                       |
|                          | SW 2     | 2                 | 10                | 562                       | 235        | 238        | 75           | 194          | 42                     | 42                     | 13                       | 35                       |
|                          | SW 3/1   | 4                 | 26                | 469                       | 236        | 157        | 23           | 208          | 50                     | 34                     | 5                        | 44                       |
|                          | SW 3/2   | 1                 | 9                 | 152                       | 53         | 47         | 24           | 40           | 35                     | 31                     | 16                       | 27                       |
|                          | SW 3/3   | 2                 | 11                | 203                       | 98         | 83         | 28           | 64           | 48                     | 41                     | 14                       | 32                       |
|                          | SW 4/1   | 4                 | 34                | 1980                      | 1452       | 368        | 189          | 1072         | 73                     | 19                     | 10                       | 54                       |
|                          | SW 4/2   | 6                 | 60                | 1489                      | 922        | 570        | 158          | 811          | 62                     | 38                     | 11                       | 54                       |
|                          | SW 4/3   | 7                 | 56                | 1777                      | 955        | 541        | 153          | 731          | 54                     | 30                     | 9                        | 41                       |
|                          | SW 4/4   | 1                 | 13                | 253                       | 122        | 96         | 19           | 64           | 48                     | 38                     | 8                        | 25                       |
|                          | SW 5     | 2                 | 9                 | 331                       | 169        | 103        | 36           | 113          | 51                     | 31                     | 11                       | 34                       |
|                          | SW 6     | 2                 | 15                | 292                       | 107        | 119        | 19           | 82           | 37                     | 41                     | 6                        | 28                       |
| Core 2                   | SW 7     | 3                 | 14                | 502                       | 277        | 150        | 46           | 166          | 55                     | 30                     | 9                        | 33                       |
|                          | SW 8     | 2                 | 13                | 307                       | 153        | 110        | 25           | 122          | 50                     | 36                     | 8                        | 40                       |
|                          | SW 9     | 2                 | 17                | 682                       | 419        | 170        | 83           | 220          | 61                     | 25                     | 12                       | 32                       |
|                          | SW 10    | 2                 | 22                | 376                       | 179        | 140        | 28           | 94           | 48                     | 37                     | 7                        | 25                       |
|                          | SW 11    | 1                 | 13                | 152                       | 71         | 59         | 20           | 38           | 47                     | 38                     | 13                       | 25                       |
|                          | 0-5 cm   | 2                 | 10                | 500                       | 205        | 164        | 113          | 75           | 41                     | 33                     | 23                       | 15                       |
|                          | 5-10 cm  | 3                 | 9                 | 504                       | 199        | 170        | 97           | 72           | 40                     | 34                     | 19                       | 14                       |
|                          | 10-15 cm | 3                 | 9                 | 505                       | 222        | 149        | 72           | 83           | 44                     | 30                     | 14                       | 16                       |
|                          | 15-20 cm | 3                 | 11                | 586                       | 273        | 165        | 112          | 101          | 47                     | 28                     | 19                       | 17                       |
|                          | 20-25 cm | 2                 | 10                | 579                       | 225        | 168        | 57           | 120          | 39                     | 29                     | 10                       | 21                       |
|                          | 25-30 cm | 3                 | 10                | 585                       | 246        | 169        | 72           | 91           | 42                     | 29                     | 12                       | 16                       |
|                          | 30-35 cm | 3                 | 10                | 456                       | 221        | 200        | 86           | 69           | 49                     | 44                     | 19                       | 15                       |
|                          | 35-40 cm | 3                 | 10                | 484                       | 263        | 139        | 127          | 81           | 54                     | 29                     | 26                       | 17                       |
|                          | 40-45 cm | 3                 | 9                 | 396                       | 212        | 130        | 69           | 90           | 54                     | 33                     | 17                       | 23                       |
|                          | 45-50 cm | 2                 | 9                 | 394                       | 200        | 118        | 58           | 91           | 51                     | 30                     | 15                       | 23                       |
|                          | 50-55 cm | 2                 | 9                 | 342                       | 153        | 85         | 41           | 76           | 45                     | 25                     | 12                       | 22                       |
| Core 3/1                 | 55-60 cm | 3                 | 10                | 493                       | 257        | 139        | 69           | 109          | 52                     | 28                     | 14                       | 22                       |
|                          | 60-65 cm | 3                 | 10                | 552                       | 320        | 202        | 81           | 146          | 58                     | 37                     | 15                       | 26                       |
|                          | 65-70 cm | 3                 | 10                | 551                       | 313        | 175        | 77           | 146          | 57                     | 32                     | 14                       | 26                       |
|                          | 70-75 cm | 3                 | 11                | 670                       | 357        | 150        | 52           | 202          | 53                     | 22                     | 8                        | 30                       |
|                          | 75-80 cm | 3                 | 11                | 447                       | 274        | 135        | 33           | 163          | 61                     | 30                     | 7                        | 36                       |
|                          | 0-5 cm   | 4                 | 27                | 466                       | 198        | 79         | 11           | 135          | 42                     | 17                     | 2                        | 29                       |
|                          | 5-10 cm  | 4                 | 31                | 414                       | 178        | 120        | 15           | 133          | 43                     | 29                     | 4                        | 32                       |
|                          | 10-15 cm | 6                 | 39                | 438                       | 132        | 173        | 15           | 119          | 30                     | 40                     | 3                        | 27                       |
|                          | 15-20 cm | 5                 | 36                | 427                       | 158        | 153        | 15           | 119          | 37                     | 36                     | 3                        | 28                       |
|                          | 20-25 cm | 4                 | 27                | 324                       | 119        | 120        | 29           | 125          | 37                     | 37                     | 9                        | 39                       |
| Core 4/2                 | 25-30 cm | 5                 | 42                | 497                       | 175        | 165        | 7            | 206          | 35                     | 33                     | 1                        | 41                       |
|                          | 30-35 cm | 2                 | 13                | 174                       | 92         | 51         | 7            | 71           | 53                     | 29                     | 4                        | 41                       |
|                          | 35-40 cm | 1                 | 8                 | 86                        | 61         | 25         | 7            | 55           | 71                     | 29                     | 8                        | 64                       |
|                          | 40-45 cm | 1                 | 11                | 76                        | 40         | 30         | 7            | 28           | 53                     | 40                     | 9                        | 38                       |
|                          | 45-50 cm | 1                 | 8                 | 56                        | 28         | 30         | 9            | 19           | 51                     | 53                     | 16                       | 34                       |
|                          | 50-55 cm | 0                 | 5                 | 42                        | 35         | 10         | 3            | 28           | 83                     | 24                     | 7                        | 67                       |
|                          | 0-5 cm   | 7                 | 45                | 1461                      | 972        | 416        | 173          | 669          | 67                     | 28                     | 12                       | 46                       |
|                          | 5-10 cm  | 6                 | 46                | 1765                      | 1139       | 510        | 221          | 681          | 65                     | 29                     | 13                       | 39                       |
| Core 4/3                 | 10-15 cm | 6                 | 44                | 1311                      | 786        | 416        | 137          | 554          | 60                     | 32                     | 10                       | 42                       |
|                          | 15-20 cm | 6                 | 49                | 1226                      | 891        | 330        | 191          | 578          | 73                     | 27                     | 16                       | 47                       |
|                          | 20-25 cm | 3                 | 31                | 2540                      | 2381       | 201        | 109          | 2082         | 94                     | 8                      | 4                        | 82                       |
|                          | 25-30 cm | 1                 | 9                 | 1050                      | 1007       | 168        | 64           | 968          | 96                     | 16                     | 6                        | 92                       |
|                          | 0-5 cm   | 9                 | 56                | 1609                      | 945        | 464        | 161          | 613          | 59                     | 29                     | 10                       | 38                       |
| Core 4/3                 | 5-10 cm  | 8                 | 51                | 1638                      | 978        | 441        | 151          | 649          | 60                     | 27                     | 9                        | 40                       |
|                          | 10-15 cm | 7                 | 49                | 1389                      | 944        | 378        | 76           | 632          | 68                     | 27                     | 5                        | 45                       |
|                          | 15-20 cm | 5                 | 37                | 903                       | 557        | 267        | 70           | 382          | 62                     | 30                     | 8                        | 42                       |
|                          | 20-25 cm | 1                 | 10                | 202                       | 162        | 55         | 25           | 96           | 80                     | 27                     | 12                       | 48                       |
| Minimum                  |          | 0                 | 5                 | 42                        | 28         | 10         | 3            | 19           | 30                     | 8                      | 1                        | 14                       |
| Maximum                  |          | 9                 | 60                | 2540                      | 2381       | 570        | 221          | 2082         | 96                     | 53                     | 26                       | 92                       |

**Table S2** Results of the Factor Analysis performed on the chemical and mineralogical data from grab and core sediments from Inle lake

| Analyte symbol | Factor 1      | Factor 2     | Factor 3      | Factor 4      | Factor 5      | Factor 6     |
|----------------|---------------|--------------|---------------|---------------|---------------|--------------|
| Ca             | -0.600        | -0.190       | 0.050         | <b>-0.745</b> | 0.010         | 0.080        |
| Mg             | -0.099        | -0.040       | 0.097         | <b>-0.868</b> | 0.194         | 0.074        |
| Sr             | -0.358        | 0.172        | -0.008        | <b>-0.855</b> | -0.106        | -0.023       |
| Ba             | <b>0.829</b>  | 0.069        | 0.229         | -0.385        | 0.185         | -0.027       |
| Be             | <b>0.956</b>  | -0.002       | 0.177         | 0.040         | 0.102         | -0.021       |
| Li             | <b>0.956</b>  | 0.097        | 0.224         | 0.109         | 0.070         | -0.005       |
| Na             | <b>0.903</b>  | 0.243        | 0.242         | 0.082         | 0.129         | -0.010       |
| K              | <b>0.972</b>  | 0.018        | 0.129         | 0.150         | 0.089         | 0.008        |
| Rb             | <b>0.971</b>  | 0.048        | 0.143         | 0.131         | 0.081         | 0.002        |
| Cs             | <b>0.914</b>  | 0.087        | 0.318         | 0.065         | 0.087         | 0.028        |
| Al             | <b>0.975</b>  | 0.082        | 0.098         | 0.151         | 0.065         | -0.006       |
| Fe             | <b>0.965</b>  | 0.145        | 0.121         | 0.120         | 0.077         | 0.000        |
| Mn             | <b>0.851</b>  | 0.306        | 0.200         | -0.162        | 0.082         | 0.048        |
| Cd             | 0.479         | <b>0.701</b> | 0.269         | -0.061        | -0.014        | -0.022       |
| Co             | <b>0.963</b>  | 0.167        | 0.118         | 0.154         | 0.059         | 0.003        |
| Cr             | <b>0.939</b>  | 0.113        | 0.139         | 0.115         | 0.056         | -0.008       |
| Cu             | <b>0.683</b>  | 0.575        | -0.055        | 0.044         | 0.091         | 0.129        |
| Ni             | <b>0.965</b>  | 0.179        | 0.043         | 0.098         | 0.062         | 0.001        |
| Pb             | <b>0.942</b>  | 0.170        | 0.239         | 0.095         | 0.064         | -0.032       |
| Mo             | -0.280        | <b>0.722</b> | 0.079         | -0.188        | -0.159        | 0.036        |
| V              | <b>0.848</b>  | 0.362        | 0.266         | 0.177         | -0.012        | 0.003        |
| Zn             | <b>0.882</b>  | 0.378        | 0.112         | 0.211         | 0.047         | -0.012       |
| W              | 0.309         | 0.485        | <b>0.730</b>  | -0.193        | -0.043        | 0.002        |
| Tl             | <b>0.929</b>  | 0.168        | 0.228         | 0.096         | 0.068         | 0.060        |
| Bi             | <b>0.911</b>  | 0.271        | 0.004         | 0.129         | -0.016        | -0.020       |
| Sn             | <b>0.713</b>  | 0.224        | 0.550         | 0.172         | 0.017         | 0.048        |
| As             | <b>0.865</b>  | 0.373        | 0.036         | 0.107         | 0.010         | -0.004       |
| Sb             | 0.403         | <b>0.719</b> | 0.485         | -0.066        | -0.090        | -0.024       |
| Ag             | <b>0.699</b>  | 0.176        | 0.527         | -0.098        | 0.110         | 0.106        |
| Au             | -0.088        | -0.014       | 0.082         | -0.043        | 0.033         | <b>0.935</b> |
| P              | 0.237         | <b>0.880</b> | 0.020         | 0.140         | -0.105        | -0.077       |
| S              | 0.201         | -0.302       | -0.369        | -0.121        | -0.224        | <b>0.419</b> |
| Sc             | <b>0.979</b>  | 0.023        | 0.012         | 0.156         | 0.071         | -0.001       |
| Ti             | <b>0.888</b>  | 0.137        | 0.358         | 0.151         | 0.025         | 0.044        |
| Y              | <b>0.973</b>  | 0.113        | 0.119         | 0.128         | 0.058         | 0.000        |
| Zr             | <b>0.957</b>  | 0.020        | 0.235         | 0.088         | 0.056         | 0.017        |
| Nb             | 0.598         | 0.164        | <b>0.728</b>  | 0.044         | 0.020         | 0.086        |
| La             | <b>0.964</b>  | 0.180        | 0.081         | 0.118         | 0.044         | -0.005       |
| Ce             | <b>0.966</b>  | 0.155        | 0.097         | 0.128         | 0.050         | -0.002       |
| Hf             | <b>0.951</b>  | -0.024       | 0.256         | 0.062         | 0.057         | 0.030        |
| Ta             | 0.550         | 0.079        | <b>0.791</b>  | -0.070        | 0.050         | 0.014        |
| U              | 0.218         | <b>0.921</b> | 0.040         | 0.110         | -0.085        | -0.058       |
| Th             | <b>0.963</b>  | 0.072        | 0.203         | 0.091         | 0.072         | -0.010       |
| Kaolinite      | <b>0.900</b>  | 0.035        | -0.198        | 0.267         | 0.074         | -0.038       |
| Mica/illite    | <b>0.954</b>  | -0.090       | -0.090        | 0.144         | 0.078         | -0.035       |
| Calcite        | <b>-0.872</b> | -0.110       | 0.098         | -0.334        | 0.180         | 0.031        |
| Aragonite      | -0.262        | 0.072        | 0.044         | -0.031        | <b>-0.918</b> | 0.052        |
| Dolomite       | 0.305         | 0.118        | <b>-0.355</b> | 0.216         | 0.134         | 0.046        |
| Hematite       | -0.134        | 0.419        | -0.051        | 0.197         | <b>-0.827</b> | -0.049       |
| Quartz         | <b>0.714</b>  | 0.145        | -0.018        | 0.415         | 0.114         | -0.022       |
| Eigenvalue     | 33.137        | 4.742        | 3.404         | 1.652         | 1.405         | 1.022        |
| % of Variance  | 60.079        | 10.285       | 7.747         | 6.477         | 3.864         | 2.272        |
| Cumulative %   | 60.079        | 70.364       | 78.11         | 84.588        | 88.452        | 90.724       |

**Table S3** Correlation matrix of the sediment data (water content, O.M. content, TP, P forms, Tab. 2) and the mineralogical data extracted from [Thin et al. \[6263\]](#). Cc = Calcite; Qz = Quartz; M/I = Mica/Illite; Kaol = Kaolinite; Ar = Aragonite; Hem = Hematite; Dol = Dolomite. In red, correlations with  $p < 0.01$ ; in blue, correlations with  $p < 0.01$  and  $r \geq 0.8$ .

|       | Water  | O.M.   | TP     | IP     | OP     | FeP    | CaP    | %IP    | %OP    | %FeP   | %CaP   | Cc     | Qz     | M/I    | Kaol   | Ar     | Hem   | Dol |
|-------|--------|--------|--------|--------|--------|--------|--------|--------|--------|--------|--------|--------|--------|--------|--------|--------|-------|-----|
| Water | 1      |        |        |        |        |        |        |        |        |        |        |        |        |        |        |        |       |     |
| O.M.  | 0.910  | 1.000  |        |        |        |        |        |        |        |        |        |        |        |        |        |        |       |     |
| TP    | 0.686  | 0.722  | 1.000  |        |        |        |        |        |        |        |        |        |        |        |        |        |       |     |
| IP    | 0.524  | 0.604  | 0.964  | 1.000  |        |        |        |        |        |        |        |        |        |        |        |        |       |     |
| OP    | 0.838  | 0.827  | 0.845  | 0.696  | 1.000  |        |        |        |        |        |        |        |        |        |        |        |       |     |
| FeP   | 0.617  | 0.552  | 0.811  | 0.714  | 0.849  | 1.000  |        |        |        |        |        |        |        |        |        |        |       |     |
| CaP   | 0.443  | 0.568  | 0.916  | 0.980  | 0.612  | 0.595  | 1.000  |        |        |        |        |        |        |        |        |        |       |     |
| %IP   | 0.023  | 0.153  | 0.504  | 0.643  | 0.246  | 0.348  | 0.649  | 1.000  |        |        |        |        |        |        |        |        |       |     |
| %OP   | -0.106 | -0.114 | -0.495 | -0.567 | -0.134 | -0.280 | -0.561 | -0.562 | 1.000  |        |        |        |        |        |        |        |       |     |
| %FeP  | -0.195 | -0.364 | -0.124 | -0.150 | -0.009 | 0.377  | -0.245 | -0.095 | 0.230  | 1.000  |        |        |        |        |        |        |       |     |
| %CaP  | 0.064  | 0.304  | 0.448  | 0.581  | 0.199  | 0.103  | 0.676  | 0.799  | -0.458 | -0.487 | 1.000  |        |        |        |        |        |       |     |
| Cc    | 0.013  | 0.288  | -0.085 | 0.000  | -0.154 | -0.360 | 0.087  | 0.170  | 0.094  | -0.516 | 0.453  | 1.000  |        |        |        |        |       |     |
| Qz    | 0.058  | -0.172 | 0.069  | -0.006 | 0.174  | 0.319  | -0.072 | -0.152 | 0.004  | 0.427  | -0.333 | -0.873 | 1.000  |        |        |        |       |     |
| M/I   | -0.231 | -0.493 | -0.131 | -0.185 | -0.099 | 0.151  | -0.247 | -0.261 | -0.015 | 0.556  | -0.512 | -0.873 | 0.662  | 1.000  |        |        |       |     |
| Kaol  | -0.066 | -0.333 | 0.003  | -0.068 | 0.096  | 0.314  | -0.156 | -0.190 | -0.005 | 0.572  | -0.488 | -0.904 | 0.727  | 0.900  | 1.000  |        |       |     |
| Ar    | 0.205  | 0.281  | 0.298  | 0.302  | 0.188  | 0.038  | 0.303  | 0.224  | -0.276 | -0.387 | 0.243  | 0.251  | -0.419 | -0.447 | -0.467 | 1.000  |       |     |
| Hem   | 0.450  | 0.538  | 0.558  | 0.519  | 0.546  | 0.483  | 0.482  | 0.328  | -0.320 | -0.180 | 0.280  | 0.057  | -0.152 | -0.393 | -0.231 | 0.725  | 1.000 |     |
| Dol   | 0.054  | -0.046 | 0.084  | 0.033  | 0.120  | 0.207  | -0.031 | -0.119 | -0.042 | 0.157  | -0.235 | -0.329 | 0.277  | 0.228  | 0.359  | -0.209 | 0.001 | 1   |

Formatted: English (United Kingdom)
